# Supplementary material for: Regulation of Cx37 channel and growth-suppressive properties by phosphorylation
Source: Oxford University Press journal article supplement (doi:10.1242/jcs.202572), 2017-08-18
Supplement: jcs202572supp.pdf [file jcs202572supp.pdf]

**Figure S1: Endothelial cells derived from Cx37<sup>-/-</sup> mouse skeletal muscle proliferate from time of isolation whereas WT-derived endothelial cells initially proliferate at slower rate.** Despite identical procedures and similar number of cells isolated, Cx37<sup>-/-</sup> endothelial cells rapidly proliferate once established in culture. However, proliferation of endothelial cells from WT mice is delayed, likely until the connexin expression profile changes.

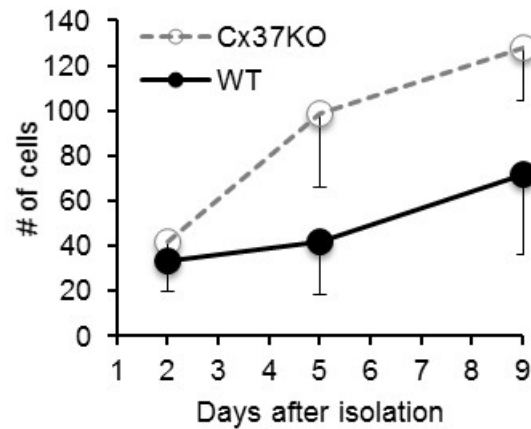

**Figure S2: Cx37-S3A3, -S7A7 and -S7D7 expression levels. A&C:** Western blots of Cx37-GST fusion protein and total cell protein isolated from iRin37-S3A3 (**A**), and iRin37-S7A7 and iRin37-S7D7 cells (**C**) stimulated with dox for 24 h. Cx37-GST runs as a triplet; the intensity of all three bands in the lanes loaded with 0.25, 0.5, 1 and 2 pmoles was used to create the standard curves illustrated in (**B&D**). The intensity of a similar area encompassing the sample bands was compared against the standard curve to determine sample content.

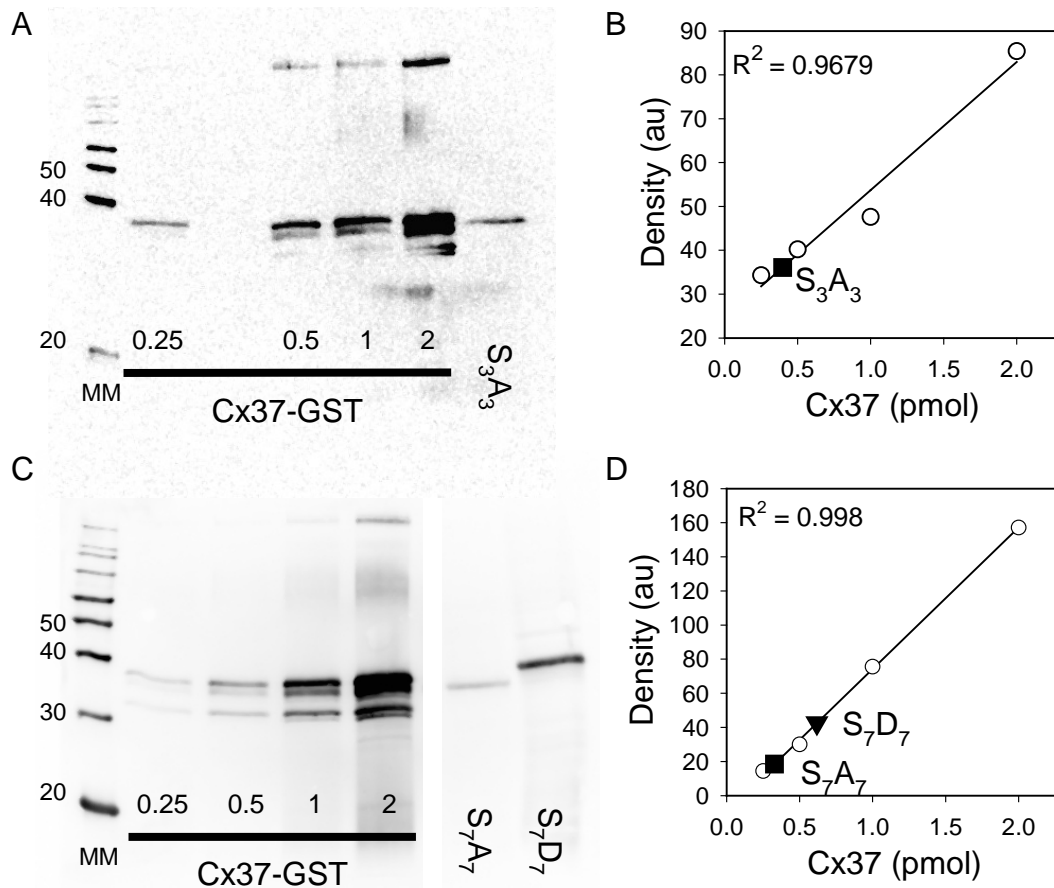

**Figure S3: Serum deprivation differentially affects the S- and G<sub>2</sub>-phase distributions of Cx37-WT, -S<sub>3</sub>A<sub>3</sub> and -S<sub>7</sub>A<sub>7</sub> expressing iRin cells. A&B:** The percentage of cells in S-phase is increased by serum deprivation in Cx37-S<sub>3</sub>A<sub>3</sub> and Cx37-S<sub>7</sub>A<sub>7</sub> expressing cells but not Cx37-WT expressing cells. For both these Cx37 isoforms, the decline in S-phase cells represents movement through the cell cycle into G<sub>1</sub> where they accumulate over the displayed time frame. **C&D:** The percentage of cells in G<sub>2</sub> did not differ in serum deprived vs. serum containing conditions for any of these Cx37 isoforms. (G<sub>1</sub> data and sample sizes are presented in figures 4 & 5 of the main text).

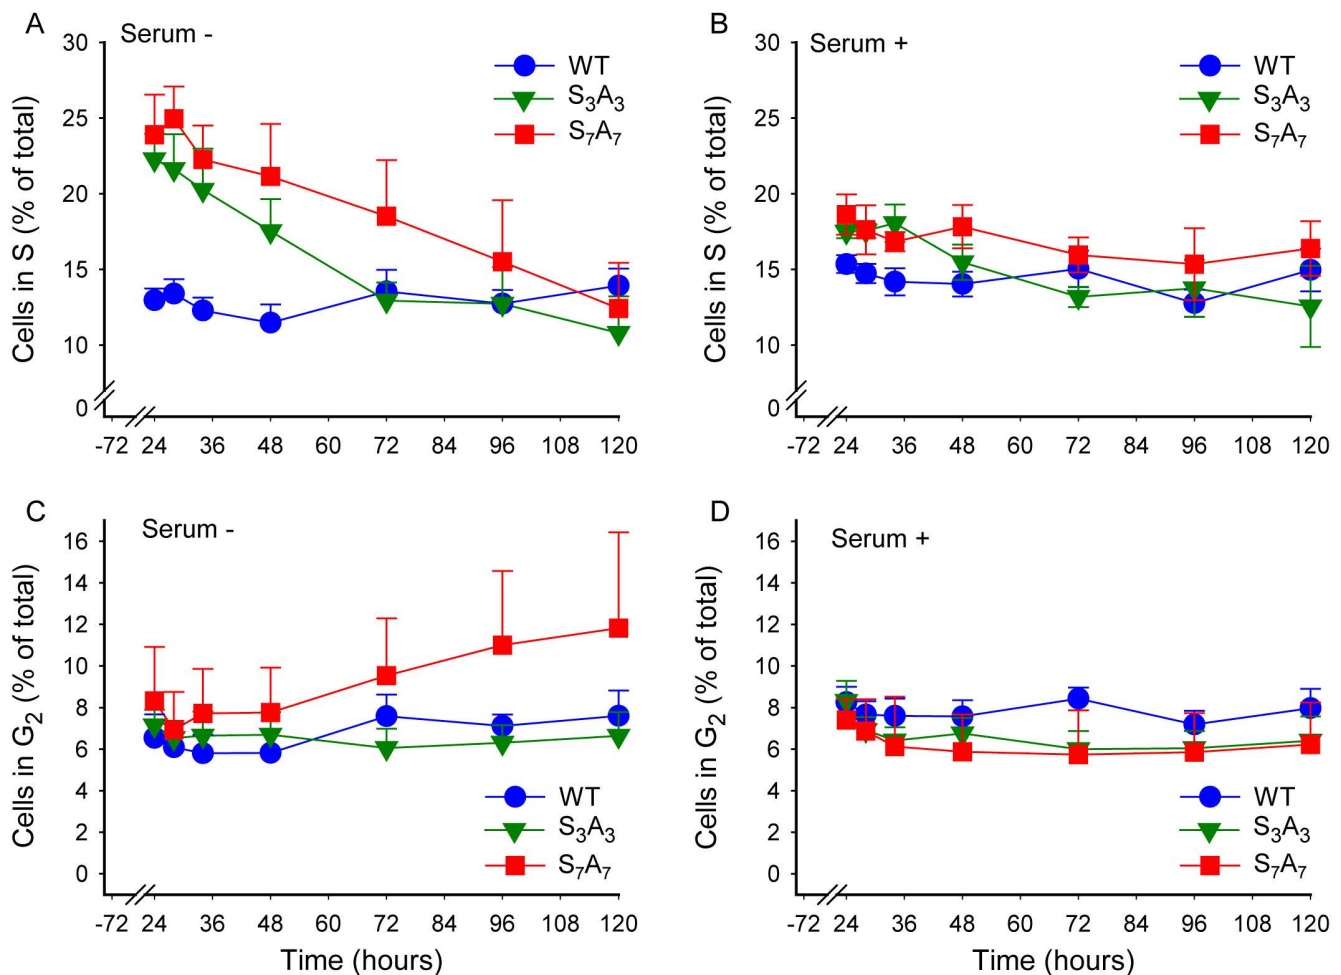

**Figure S4: Primers used to generate mutants.** Mutations were induced sequentially, leading to the constructs indicated right column.

| Mutation                            | Primer sequence                                                                                  | Construct                          |
|-------------------------------------|--------------------------------------------------------------------------------------------------|------------------------------------|
| S302A                               | F-5'gagagactgaccgctccagactccc3'<br>R-5'gggaggctggaagcggcagctctc3'                                |                                    |
| S302, 328A                          | F-5'ccaacagctctgcagccaagaagcagtatgtg3'<br>R-5'acacatactgcttcttgctgcagagctgttg3'                  |                                    |
| S275, 302, 328A                     | F-5'gggaccctctgccccaccgtgtc3'<br>R-5'gacacgggtgggagaggggtccc3'                                   | Cx37-S <sub>3</sub> A <sub>3</sub> |
| S275, 285, 302, 328A                | F-5'cctacaacgggctcgtccactgagcagaac3'<br>R-5'gttctgctcagtggaagcagcccgtttagg3'                     |                                    |
| S275, 285, 302, 319, 328A           | F-5'cagggtggccgaaaggcacctagccgccccaac3'<br>R-5'gttggggcggctagggtccttcggccaccctg3'                |                                    |
| S275, 285, 302, 319, 321, 325, 328A | F-5'ggcacctgcccccccaacgcctctg3'<br>R-5'cagaggcgtggggcgggcaggtgcc3'                               | Cx37-S <sub>7</sub> A <sub>7</sub> |
| S275D                               | F-5'catgggcgagggaccctctgatccaccgtgtcccactac3'<br>R-5'gtagggtgggacacgggtggatcagagggctcctcgcccag3' |                                    |
| S275, 319D                          | F-5'cagggtggccgaaaggatcctagccgccccaac3'<br>R-5'gttggggcggctaggatccttcggccaccctg3'.               |                                    |
| S275, 319, 328D                     | F-5'ccaacagctctgcagacaagaagcagtatg3'<br>R-5'catactgcttctgtctgcagagctgttggg3'                     |                                    |
| S275, 285, 319, 328D                | F-5'cctacaacgggctcgtccactgagcagaac3'<br>R-5'gttctgctcagtgagtcgagcccgtttagg3'                     |                                    |
| S275, 285, 302, 319, 328D           | F-5'cacagaggagagactgaccgactccagacctccccatttg3'<br>R-5'caaatggggaggctctggagtcggtcagctctcctctgtg3' |                                    |
| S275, 285, 302, 319, 321, 325, 328D | F-5'gccgaaaggatcctgaccgccccaacgactctgcagacaa3'<br>R-5'ctgtctgcagagtcgtggggcggcaggatccttcggc3'    | Cx37-S <sub>7</sub> D <sub>7</sub> |
